# Supplementary material for: Selection of Diagnostically Significant Regions of the SLC26A4 Gene Involved in Hearing Loss
Source: MDPI journal article supplement (doi:10.3390/ijms232113453), 2022-11-03
Supplement: s1 [file s1]

**Table S2.** Combined data on the prevalence of most frequent PLP variants in the *SLC26A4* gene.

| Variant |                              | Data from the DVD v9 version * |        |                        |             |                    | Data from [19]                          |
|---------|------------------------------|--------------------------------|--------|------------------------|-------------|--------------------|-----------------------------------------|
|         |                              | Exon                           | Intron | Variant Classification | Max MAF (%) | Max MAF Source     | Allele frequency in cohorts of patients |
| 1       | 7:107301201:T>C              | null                           | null   | P                      | 0.337137    | gnomad_AF_nfe_pass | -                                       |
| 2       | 7:107301244:A>G              | null                           | null   | P                      | 0.149254    | gnomad_AF_afr_pass | -                                       |
| 3       | c.-4+5G>A                    | null                           | 1/20   | LP                     | 0.235849    | gnomad_AF_amr_pass | -                                       |
| 4       | p.Leu75= (c.225C>G)          | 3/21                           | null   | P                      | 0.0952954   | gnomad_AF_eas_pass | -                                       |
| 5       | p.Leu117SerfsTer9 (c.349del) | 4/21                           | null   | P                      | 0.0641026   | gnomad_AF_eas_pass | -                                       |
| 6       | p.Val138Phe (c.412G>T)       | 4/21                           | null   | P                      | 0.0294542   | gnomad_AF_nfe_pass | 0.098                                   |
| 7       | p.Gly209Val (c.626G>T)       | 6/21                           | null   | P                      | 0.0580729   | gnomad_AF_nfe_pass | 0.070                                   |
| 8       | p.Val233Leu (c.697G>C)       | 6/21                           | null   | P                      | 0.14135     | gnomad_AF_eas_pass | -                                       |
| 9       | p.Leu236Pro (c.707T>C)       | 6/21                           | null   | P                      | 0.0596418   | gnomad_AF_nfe_pass | 0.039                                   |
| 10      | p.Val239Asp (c.716T>A)       | 6/21                           | null   | P                      | 0.16658     | gnomad_AF_sas_pass | -                                       |
| 11      | p.Ile253Val (c.757A>G)       | 6/21                           | null   | LP                     | 0.0598021   | gnomad_AF_eas_pass | -                                       |
| 12      | c.919-2A>G                   | null                           | 7/20   | P                      | 0.506367    | gnomad_AF_eas_pass | 0.624                                   |
| 13      | c.1001+1G>A                  | null                           | 8/20   | P                      | 0.0397655   | gnomad_AF_nfe_pass | 0.045                                   |
| 14      | p.Phe335Leu (c.1003T>C)      | 9/21                           | null   | P                      | 0.248269    | gnomad_AF_sas_pass | 0.037                                   |
| 15      | p.Phe354Ser (c.1061T>C)      | 9/21                           | null   | P                      | 0.149658    | gnomad_AF_amr_pass | -                                       |
| 16      | p.Ala360Val (c.1115C>T)      | 9/21                           | null   | P                      | 0.0641026   | gnomad_AF_eas_pass | 0.058                                   |
| 17      | p.Ala372Val (c.1115C>T)      | 9/21                           | null   | P                      | 0           | null               | 0.064                                   |
| 18      | p.Asn392Tyr (c.1174A>T)      | 10/21                          | null   | P                      | 0.00543833  | gnomad_AF_eas_pass | 0.039                                   |
| 19      | p.Ser399Pro (c.1195T>C)      | 10/21                          | null   | P                      | 0.0881892   | gnomad_AF_sas_pass | -                                       |
| 20      | p.Arg409His (c.1226G>A)      | 10/21                          | null   | P                      | 0.0197684   | gnomad_AF_amr_pass | 0.072                                   |
| 21      | p.Thr410Met (c.1229C>T)      | 10/21                          | null   | P                      | 0.0587928   | gnomad_AF_sas_pass | 0.066                                   |
| 22      | p.Thr416Pro (c.1246A>C)      | 10/21                          | null   | P                      | 0.0365452   | gnomad_AF_nfe_pass | 0.062                                   |
| 23      | p.Gln421Pro (c.1262A>C)      | 10/21                          | null   | LP                     | 0.00501505  | gnomad_AF_eas_pass | 0.047                                   |
| 24      | p.Leu445Trp (c.1334T>G)      | 11/21                          | null   | P                      | 0.0186616   | gnomad_AF_nfe_pass | 0.089                                   |
| 25      | p.Gln446Arg (c.1337A>G)      | 11/21                          | null   | LP                     | 0.0588005   | gnomad_AF_sas_pass | -                                       |
| 26      | p.Ser448Leu (c.1343C>T)      | 12/21                          | null   | LP                     | 0.0108814   | gnomad_AF_eas_pass | 0.041                                   |
| 27      | p.Ile490Leu (c.1468A>C)      | 13/21                          | null   | P                      | 0.24497     | gnomad_AF_sas_pass | -                                       |
| 28      | p.Ile491Thr (c.1472T>C)      | 13/21                          | null   | P                      | 0.0601443   | gnomad_AF_eas_pass | -                                       |
| 29      | p.Tyr530His (c.1588T>C)      | 14/21                          | null   | P                      | 0.00440319  | gnomad_AF_nfe_pass | 0.091                                   |
| 30      | c.1614+1G>A                  | null                           | 14/20  | P                      | 0.00352541  | gnomad_AF_nfe_pass | 0.056                                   |
| 31      | c.1707+5G>A                  | null                           | 15/20  | P                      | 0.0109206   | gnomad_AF_eas_pass | 0.042                                   |
| 32      | c.1804-6G>A                  | null                           | 16/20  | P                      | 0.29096     | gnomad_AF_eas_pass | -                                       |
| 33      | p.Glu635= (c.1905G>A)        | 17/21                          | null   | P                      | 0.160417    | gnomad_AF_eas_pass | -                                       |
| 34      | p.Val659Leu (c.1975G>C)      | 17/21                          | null   | P                      | 0.0200562   | gnomad_AF_eas_pass | 0.036                                   |
| 35      | p.Asp661Glu (c.1983C>A)      | 17/21                          | null   | P                      | 0.165463    | gnomad_AF_eas_pass | -                                       |
| 36      | p.Val670Ala (c.2009T>C)      | 17/21                          | null   | P                      | 0.0902437   | gnomad_AF_eas_pass | -                                       |
| 37      | p.Leu676Gln (c.2027T>A)      | 17/21                          | null   | P                      | 0           | null               | 0.049                                   |
| 38      | p.Lys715Asn (c.2145G>T)      | 19/21                          | null   | P                      | 0.0947403   | gnomad_AF_sas_pass | -                                       |
| 39      | p.Thr721Met (c.2162C>T)      | 19/21                          | null   | P                      | 0.0289503   | gnomad_AF_amr_pass | 0.041                                   |
| 40      | p.His723Arg (c.2168A>G)      | 19/21                          | null   | P                      | 0.160385    | gnomad_AF_eas_pass | 0.261                                   |
| 41      | p.Thr761= (c.2283A>G)        | 20/21                          | null   | P                      | 0.145334    | gnomad_AF_eas_pass | -                                       |
| 42      | p.Arg776Cys (c.2326C>T)      | 21/21                          | null   | LP                     | 0.289631    | gnomad_AF_nfe_pass | -                                       |

\* – Deafness Variation Database: <https://deafnessvariationdatabase.org/gene/SLC26A4>, accessed on 6 June 2022), NC\_000007.13 ([https://www.ncbi.nlm.nih.gov/nucore/NC\\_000007.13](https://www.ncbi.nlm.nih.gov/nucore/NC_000007.13), accessed on 6 June 2022), NM\_000441.2 ([https://www.ncbi.nlm.nih.gov/nucore/NM\\_000441.2](https://www.ncbi.nlm.nih.gov/nucore/NM_000441.2), accessed on 6 June 2022), NP\_000432.1 ([https://www.ncbi.nlm.nih.gov/protein/NP\\_000432.1](https://www.ncbi.nlm.nih.gov/protein/NP_000432.1), accessed on 6 June 2022).

Seven *SLC26A4* PLP variants with coinciding high MAFs and high mutation rates in patients are highlighted in grey.
