# Supplementary material for: Selection of Diagnostically Significant Regions of the SLC26A4 Gene Involved in Hearing Loss
Source: MDPI journal article supplement (doi:10.3390/ijms232113453), 2022-11-03
Supplement: s1 [file s1]

**Table S1.** The synonymous variants in the *SLC26A4* coding region.

| Genomic Description (GRCh37) | HGVS Nucleotide Change (NM_000441.2) | HGVS Protein Change (NP_000432.1) | Variant Classification | Consequence                                | Exon  | References    |
|------------------------------|--------------------------------------|-----------------------------------|------------------------|--------------------------------------------|-------|---------------|
| 7:107303801:C>G              | c.225C>G                             | p.Leu75=                          | P                      | Synonymous variant                         | 3/21  | [23,35–37,40] |
| 7:107315467:T>C              | c.678T>C                             | p.Ala226=                         | P                      | Synonymous variant                         | 6/21  | [23,35,37]    |
| 7:107323799:G>A              | c.918G>A                             | p.Val306=                         | LP                     | Splice region variant & synonymous variant | 7/21  | -             |
| 7:107330643:C>T              | c.1224C>T                            | p.Ser408=                         | P                      | Synonymous variant                         | 10/21 | -             |
| 7:107334901:G>C              | c.1317G>C                            | p.Gly439=                         | LP                     | Synonymous variant                         | 11/21 | [38]          |
| 7:107341641:G>A              | c.1803G>A                            | p.Lys601=                         | P                      | Splice region variant & synonymous variant | 16/21 | [39,42]       |
| 7:107342373:G>A              | c.1905G>A                            | p.Glu635=                         | P                      | Synonymous variant                         | 17/21 | [23,35,37]    |
| 7:107342502:G>A              | c.2034G>A                            | p.Val678=                         | LP                     | Splice region variant & synonymous variant | 17/21 | [41]          |
| 7:107350614:T>G              | c.2205T>G                            | p.Ser735=                         | P                      | Synonymous variant                         | 19/21 | [35]          |
| 7:107353031:A>G              | c.2283A>G                            | p.Thr761=                         | P                      | Synonymous variant                         | 20/21 | [35,40]       |
